# Supplementary material
Source: HighWire-hosted journal article supplement (https://www.cmajopen.ca/highwire/filestream/89525/field_highwire_adjunct_files/2/open-2022-0098-3-at.pdf)
Supplement: open-2022-0098-3-at.pdf [file open-2022-0098-3-at.pdf]

## Appendix 3. DistillerSR AI Re-ranking output

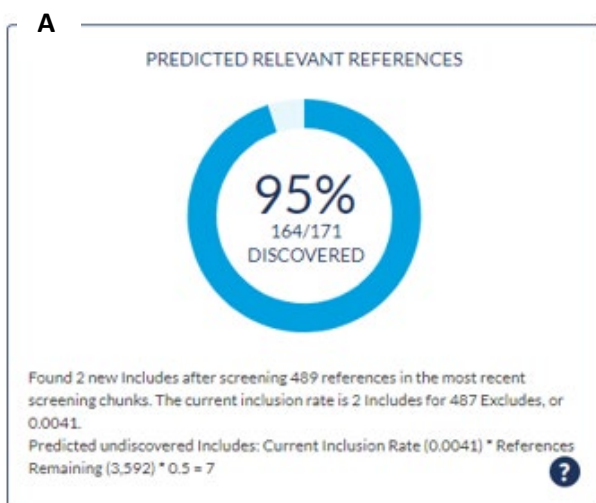

**Graph A** displays the number of predicted relevant references identified. This is based on a calculation, which is provided below the chart.

**Graph B** displays the reviewing progress. Each dot on the line chart is an iteration (i.e., a set of screened records informing the active machine-learning tool). As the AI is presenting the most relevant records in prioritized order, there will be a step incline to the curve for the first few iterations. As additional records are screened, and most of the included records should have already been identified, you can see how that the curve begins to level off.

**Graph C** displays the value of the likelihood of inclusion of the remaining unscreened records. In this example, you will see that there are 3592 records that have not been screened and the likelihood of inclusion falls in the 0% to 9% range.

**Table D** displays a tabular format of the reviewing progress. It displays the date and time the re-rank was run, the highest remaining score (likelihood of inclusion) of the remaining unscreened records, the training size (the number of records screened), the number of records included, the number of records excluded, and the values of the bars in the histogram/bar chart (as displayed in Graph C).

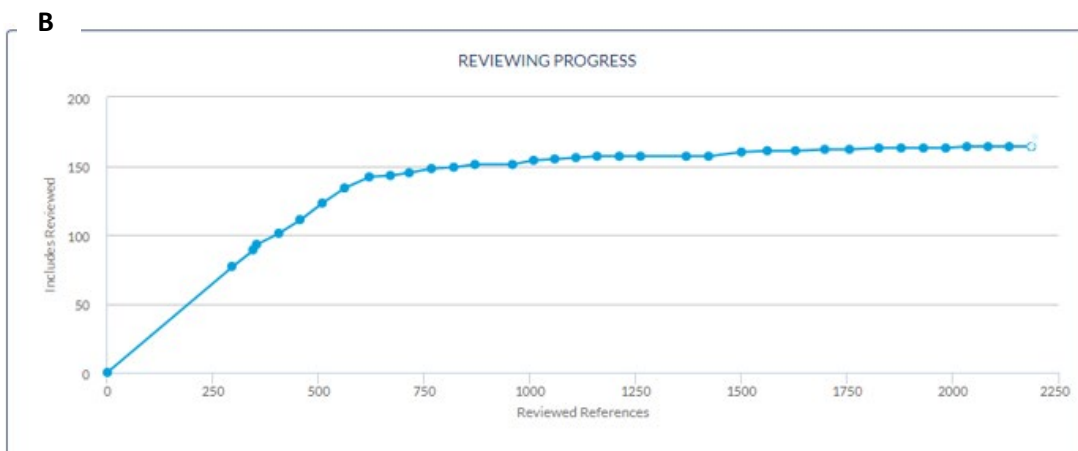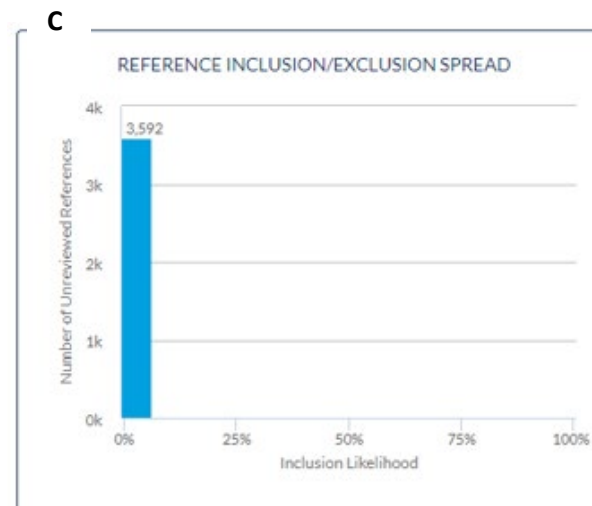

**D**

| Run Time            | Highest Remaining Score | Training Size | Includes Reviewed | Excludes Reviewed | Histogram |
|---------------------|-------------------------|---------------|-------------------|-------------------|-----------|
| 2021-08-04 15:38:21 | 0.0381                  | 2188          | 164               | 2024              | [~3592~]  |
